# Supplementary material
Source: PubMed Central journal article supplement (PMC2933833)
Supplement: NIHMS194415-supplement-supplemental_data_1.pdf [file NIHMS194415-supplement-supplemental_data_1.pdf]

**A****CSEP<sup>neo</sup>-CHX10**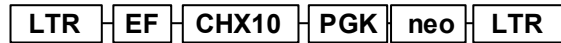**CSEP<sup>neo</sup>-CHX10VP16**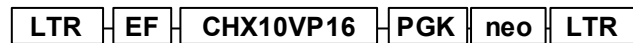**B**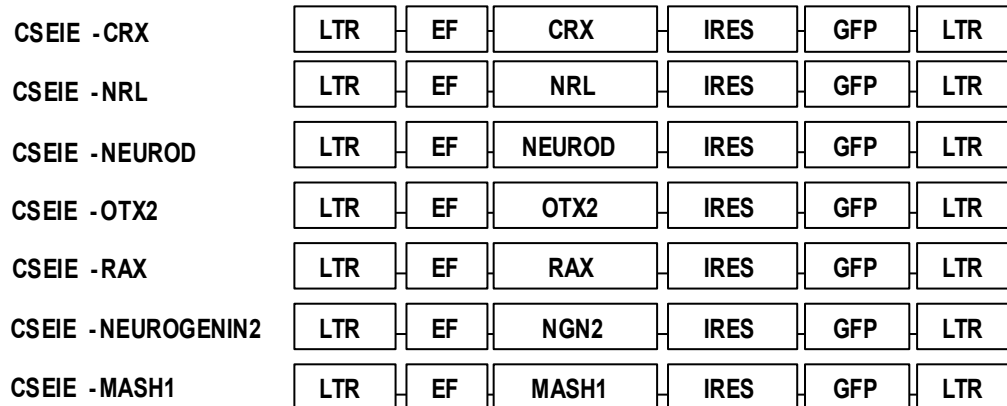**C**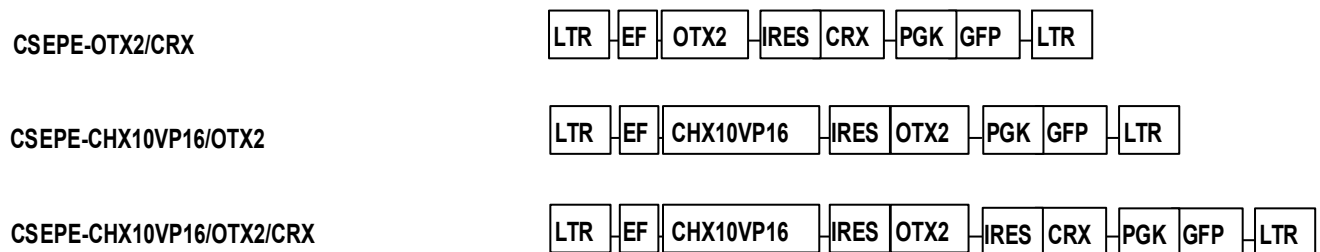

**Supplemental Figure 1.** Vector construction **(A)** Schematic illustration of lentiviral constructs containing the PGK promoter-neomycin resistance gene (Pneo). CHX10 and CHX10VP16 were cloned in CSEP<sup>neo</sup>. Cells transfected with this vector can be selected using neomycin. **(B)** Lentiviral vector construction. Genes important for photoreceptor differentiation such as CRX, NRL, NEUROD, OTX2, NEUROGENIN2 or MASH1 were cloned into CSEIE. **(C)** Construction of lentiviral vectors for co-expression of CHX10VP16, OTX2 and/or CRX. OTX2 or CRX were placed behind on IRES sequence.
