# Supplementary material
Source: PubMed Central journal article supplement (PMC2933833)
Supplement: NIHMS194415-supplement-Supplemental_data_2.pdf [file NIHMS194415-supplement-Supplemental_data_2.pdf]

**A**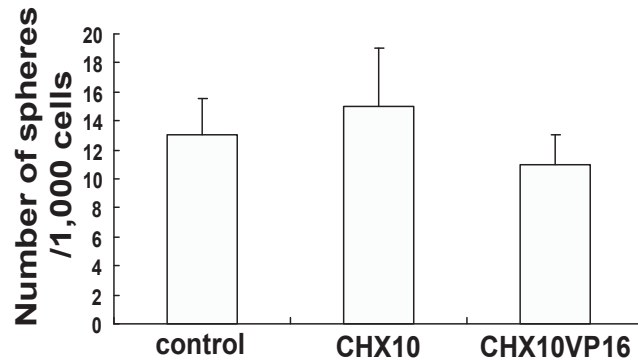**B**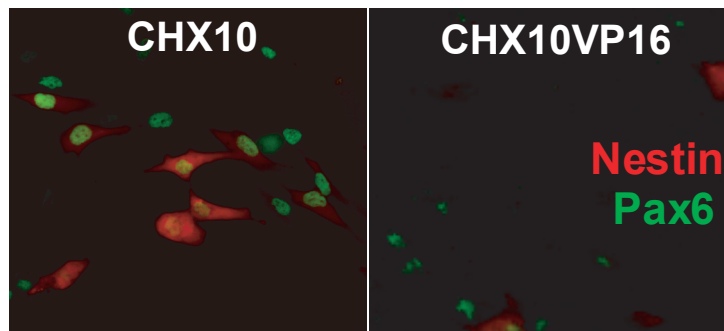

**Supplemental Figure 2.** (A) After RSC sphere passaging, secondary sphere numbers showed no significant differences ( $*p>0.05$ ). This result suggests that CHX10 works primarily on retinal progenitor and not retinal stem cells. (B) Results of the in vitro differentiation assay with hRSC colonies transfected with CHX10 (Left), or CHX10VP16 (Right) -expressing lentiviral vectors after neomycin selection. Neomycin selection was performed 3 days after virus infection. Panels show fluorescent images using anti-NESTIN antibody (red) and anti-PAX6 antibody (green). PAX6/NESTIN double labeling indicates undifferentiated retinal cells. With CHX10 transduction, most of hRSC progeny maintained an undifferentiated state. In contrast, CHX10VP16 transduction significantly decreased the number of undifferentiated cells.
